# Supplementary material for: Genome-Wide Association Studies Reveal Candidate Genes Associated with Pigmentation Patterns of Single Feathers of Tianfu Nonghua Ducks
Source: MDPI journal article supplement (doi:10.3390/ani14010085), 2023-12-26
Supplement: s1 [file s1]

### Supplementary Tables and Figures

**Table S1:** Correlation results for ventral side feathers traits.

| Traits | LCA    | RCA    | TCA    | LCL    | RCL |
|--------|--------|--------|--------|--------|-----|
| LCA    | 1      |        |        |        |     |
| RCA    | 0.92** | 1      |        |        |     |
| TCA    | 0.98** | 0.98** | 1      |        |     |
| LCL    | 0.78** | 0.77** | 0.79** | 1      |     |
| RCL    | 0.77** | 0.77** | 0.79** | 0.98** | 1   |

\*\* Correlation is significant at 0.01 significant level, LCA =Left color area, RCA= Right color area, TCA = Total color area, LCL= left color length, RCL=Right color length.

**Table S2:** Correlation results for dorsal side feather traits.

| Traits | LCA    | RCA    | TCA    | LCL    | RCL |
|--------|--------|--------|--------|--------|-----|
| LCA    | 1      |        |        |        |     |
| RCA    | 0.69** | 1      |        |        |     |
| TCA    | 0.89** | 0.86** | 1      |        |     |
| LCL    | 0.44** | 0.37** | 0.41** | 1      |     |
| RCL    | 0.48** | 0.40** | 0.45** | 0.96** | 1   |

\*\* Correlation is significant at 0.01 significant level, LCA =Left color area, RCA= Right color area, TCA = Total color area, LCL= left color length, RCL=Right color length

**Table S3:** Correlation results for dorsal and ventral side feathers area traits.

| Traits | DLCA   | DRCA   | DTCA | VLCA   | VRCA   | VTCA |
|--------|--------|--------|------|--------|--------|------|
| DLCA   | 1      |        |      |        |        |      |
| DRCA   | 0.69** | 1      |      |        |        |      |
| DTCA   | 0.89** | 0.86** | 1    |        |        |      |
| VLCA   | -0.04  | 0.04   | 0.05 | 1      |        |      |
| VRCA   | 0.02   | 0.04   | 0.02 | 0.92** | 1      |      |
| VTCA   | 0.04   | 0.04   | 0.03 | 0.98** | 0.98** | 1    |

\*\* Correlation is significant at 0.01 significant level, DLCA = Dorsal left color area, DRCA= Dorsal Right color area, DTCA= Dorsal Total color area, VLCA= Ventral left color area, VRCA= Ventral right color area, VTCA= Ventral total color area.

**Table S4:** Correlation results for dorsal and ventral side feathers length traits.

| Traits | VLCL   | VRCL | DLCL   | DRCL |
|--------|--------|------|--------|------|
| VLCL   | 1      |      |        |      |
| VRCL   | 0.98** | 1    |        |      |
| DLCL   | 0.05** | 0.03 | 1      |      |
| DRCL   | -0.03  | 0.02 | 0.96** | 1    |

\*\* Correlation is significant at 0.01 significant level, VLCL= Ventral left color length, VRCL= Ventral right color length, DLCL= Dorsal left color length, DRCL= Dorsal Right color length.

**Table S5:** T-test results of Ventral feather area traits

|  | Male, n=156 | Female, n=171 | 95% CI | P |
|--|-------------|---------------|--------|---|
|--|-------------|---------------|--------|---|

| Parameters | M (μm <sup>2</sup> ) | SD      | M (μm <sup>2</sup> ) | SD      | t    | Lower   | Upper   |       |
|------------|----------------------|---------|----------------------|---------|------|---------|---------|-------|
| LCA        | 1924.1               | 1773.02 | 1041.51              | 2058.65 | 4.15 | 464.38  | 1300.92 | 0.00  |
| LTA        | 13297.8              | 3622.56 | 11856.46             | 3758.10 | 3.50 | 639.24  | 2242.89 | 0.00  |
| RCA        | 2084.203             | 1949.01 | 1137.02              | 2203.59 | 4.12 | 494.51  | 1399.86 | 0.00  |
| RTA        | 14119.03             | 4084.77 | 12631.1              | 4397.84 | 3.17 | 565.16  | 2410.56 | 0.002 |
| TCA        | 4008.34              | 3623.36 | 2178.49              | 4189.99 | 4.22 | 977.09  | 2682.58 | 0.00  |
| TFA        | 27441.76             | 7250.93 | 24488.79             | 7570.50 | 3.60 | 1339.67 | 4566.28 | 0.00  |
| Ratios     |                      |         |                      |         |      |         |         |       |
| LCA: LTA   | 0.15                 | 0.14    | 0.09                 | 0.17    | 3.33 | 0.023   | 0.092   | 0.001 |
| RCA: RTA   | 0.15                 | 0.14    | 0.09                 | 0.169   | 3.41 | 0.025   | 0.092   | 0.001 |
| TCA:TFA    | 0.15                 | 0.14    | 0.09                 | 0.17    | 3.45 | 0.025   | 0.092   | 0.001 |

M =Mean; SD =Standard Deviation; t = t-test value; CI = Confidence Interval; P =Probability value; LCA =Left color area; LTA =Left total area; RCA= Right color area; RTA = Right total area; TCA = Total color area; TFA = Total feather area; LCA:LTA= ratio of left color area to left total area; RCA:RTA= ratio of right color area to right total area; TCA:TFA = ratio of total color area to total feather.

**Table S6: T-test results of Ventral feather length traits**

|            | Male, n=156 |      | Female, n=171 |      |      | 95% CI |       | P     |
|------------|-------------|------|---------------|------|------|--------|-------|-------|
| Parameters | M (cm)      | SD   | M (cm)        | SD   | t    | Lower  | Upper |       |
| LCL        | 0.94        | 0.69 | 0.54          | 0.76 | 5.03 | 0.25   | 0.56  | 0.00  |
| RCL        | 1.00        | 0.73 | 0.57          | 0.80 | 5.12 | 0.27   | 0.60  | 0.00  |
| FL         | 3.84        | 0.49 | 3.53          | 0.55 | 5.42 | 0.20   | 0.42  | 0.00  |
| FRL        | 0.32        | 0.21 | 0.29          | 0.22 | 1.43 | -0.01  | 0.08  | 0.155 |
| TFL        | 4.17        | 0.45 | 3.82          | 0.56 | 6.13 | 0.23   | 0.46  | 0.00  |
| Ratios     |             |      |               |      |      |        |       |       |
| LCL :FL    | 0.25        | 0.17 | 0.16          | 0.21 | 3.99 | 0.04   | 0.13  | 0.00  |
| RCL :FL    | 0.26        | 0.19 | 0.18          | 0.25 | 3.49 | 0.04   | 0.13  | 0.001 |
| LCL : TFL  | 0.23        | 0.16 | 0.15          | 0.20 | 3.78 | 0.04   | 0.12  | 0.00  |
| RCL: TFL   | 0.24        | 0.17 | 0.16          | 0.24 | 3.26 | 0.03   | 0.12  | 0.001 |
| FRL:TFL    | 0.08        | 0.05 | 0.07          | 0.05 | 0.65 | -0.007 | 0.014 | 0.519 |

FL: TFL      0.92      0.05      0.93      0.05      -0.65      -0.014      0.007      0.519

M =Mean; SD =Standard Deviation; t = t-test value; CI = Confidence Interval; P =Probability value; LCL= left color length; RCL=Right color length; FL= Feather length; FRL= Feather root length; TFL= Total feather length; LCL:FL= ratio of left color length to feather length; RCL:FL= ratio of right color length to feather length; LCL:TFL = ratio of left color length to total feather length; RCL:TFL= ratio of right color length to total feather length; FRL:TFL = ratio of feather root length to total feather length; FL:TFL= ratio of feather length to total feather length.

**Table S7:** T-test results of dorsal feather area traits.

| Parameters    | Male, n=142          |          | Female, n=178        |          | t    | 95% CI  |          | P     |
|---------------|----------------------|----------|----------------------|----------|------|---------|----------|-------|
|               | M (μm <sup>2</sup> ) | SD       | M (μm <sup>2</sup> ) | SD       |      | Lower   | Upper    |       |
| LCA           | 20011.035            | 8038.03  | 15416.27             | 4147.17  | 6.61 | 3226.45 | 5963.67  | 0.00  |
| LTA           | 34694.83             | 12197.80 | 28518.18             | 7636.606 | 5.53 | 3980.36 | 8372.92  | 0.00  |
| RCA           | 21696.52             | 11241.68 | 16260.29             | 5431.64  | 5.57 | 3551.89 | 7320.58  | 0.00  |
| RTA           | 35837.52             | 12891.26 | 30380.97             | 9722.05  | 4.32 | 2968.73 | 7944.36  | 0.00  |
| TCA           | 40287.50             | 15716.40 | 31619.44             | 9218.38  | 6.15 | 5895.84 | 11440.26 | 0.00  |
| TFA           | 70532.34             | 24309.99 | 58899.15             | 16253.54 | 5.11 | 7155.76 | 16110.61 | 0.00  |
| <b>Ratios</b> |                      |          |                      |          |      |         |          |       |
| LCA : LTA     | 0.58                 | 0.13     | 0.56                 | 0.12     | 2.13 | 0.002   | 0.060    | 0.034 |
| RCA: RTA      | 0.62                 | 0.20     | 0.57                 | 0.16     | 2.45 | 0.009   | 0.091    | 0.015 |
| TCA:TFA       | 0.60                 | 0.15     | 0.56                 | 0.12     | 2.85 | 0.013   | 0.074    | 0.005 |

M =Mean; SD =Standard Deviation; t = t-test value; CI = Confidence Interval; P =Probability value; LCA =Left color area; LTA =Left total area; RCA= Right color area; RTA = Right total area; TCA = Total color area; TFA = Total feather area; LCA:LTA= ratio of left color area to left total area; RCA:RTA= ratio of right color area to right total area; TCA:TFA = ratio of total color area to total feather.

**Table S8:** T-test results of dorsal feather length traits

| Parameters | Male, n=142 |      | Female, n=178 |      | t    | 95% CI |       | P     |
|------------|-------------|------|---------------|------|------|--------|-------|-------|
|            | M (cm)      | SD   | M (cm)        | SD   |      | Lower  | Upper |       |
| LCL        | 3.87        | 0.68 | 3.219         | 0.49 | 8.92 | 0.45   | 0.71  | 0.000 |
| RCL        | 3.79        | 0.67 | 3.35          | 0.48 | 9.67 | 0.49   | 0.75  | 0.000 |

|               |       |      |       |      |       |       |       |       |
|---------------|-------|------|-------|------|-------|-------|-------|-------|
| FL            | 5.06  | 0.33 | 4.50  | 0.37 | 13.91 | 0.48  | 0.63  | 0.000 |
| FRL           | 0.13  | 0.15 | 0.18  | 0.17 | -3.18 | -0.09 | -0.02 | 0.002 |
| TFL           | 4.94  | 0.44 | 4.89  | 0.45 | 11.96 | 0.42  | 0.58  | 0.000 |
| <b>ratios</b> |       |      |       |      |       |       |       |       |
| LCL :FL       | 0.76  | 0.12 | 0.73  | 0.09 | 2.78  | 0.02  | 0.06  | 0.006 |
| RCL :FL       | 0.79  | 0.12 | 0.74  | 0.09 | 3.39  | 0.02  | 0.09  | 0.001 |
| LCL : TFL     | 0.75  | 0.12 | 0.73  | 0.43 | 0.35  | -0.06 | 0.09  | 0.724 |
| RCL: TFL      | 0.77  | 0.12 | 0.74  | 0.40 | 0.68  | -0.04 | 0.09  | 0.498 |
| FRL:TFL       | 0.023 | 0.02 | 0.032 | 0.04 | -4.77 | -0.02 | -0.01 | 0.000 |
| FL: TFL       | 0.98  | 0.02 | 0.96  | 0.04 | 4.77  | 0.01  | 0.02  | 0.000 |

M =Mean; SD =Standard Deviation; t = t-test value; CI = Confidence Interval; P =Probability value; LCL= left color length; RCL=Right color length; FL= Feather length; FRL= Feather root length; TFL= Total feather length; LCL:FL= ratio of left color length to feather length; RCL:FL= ratio of right color length to feather length; LCL:TFL = ratio of left color length to total feather length; RCL:TFL= ratio of right color length to total feather length; FRL:TFL = ratio of feather root length to total feather length; FL:TFL= ratio of feather length to total feather length.

**Table S9:** Results of GO enrichment analysis for identified candidate genes

| GO term                                      | ID         | P-value               | FDR P-value1          | Gene                                                                                                                                                                                                       |
|----------------------------------------------|------------|-----------------------|-----------------------|------------------------------------------------------------------------------------------------------------------------------------------------------------------------------------------------------------|
| Integral component of membrane               | GO:0016021 | $3.12 \times 10^{-7}$ | $5.30 \times 10^{-4}$ | VAPA, SEC63,                                                                                                                                                                                               |
| Cytoplasm                                    | GO:0005737 | $4.32 \times 10^{-6}$ | $3.40 \times 10^{-3}$ | PSTPIP1, SESN1, STK3,                                                                                                                                                                                      |
| Substrate adhesion- dependent cell spreading | GO:0034446 | $1.04 \times 10^{-5}$ | $3.40 \times 10^{-3}$ | PEAK1, RAB1A, TMEFF2, ITGAV, NRP1                                                                                                                                                                          |
| Positive regulation of GTPase activity       | GO:0043547 | $1.09 \times 10^{-5}$ | $3.40 \times 10^{-3}$ | DENND1A, DOCK1, RGS4, RTN4R, ZC3H15, RGS1, DENND1B, NRP1                                                                                                                                                   |
| Nucleus                                      | GO:0005634 | $1.18 \times 10^{-5}$ | $3.40 \times 10^{-3}$ | STK3, RALYL, ZNF704, TENM4, MEIS1, PURG, PTPRE, AGL, RGS4, ATF6, ONECUT1, POU2F1, CCNI, PANK4, ZC3H15, WRN, PKP2, BABAM2, ATF3, RXRG, PPP2CB, CDKL2, USP24, DOK1, KLF12, CAMTA1, CDK12, LHX9, DDX11, MAGI2 |
| ATP binding                                  | GO:0005524 | $1.20 \times 10^{-5}$ | $3.40 \times 10^{-3}$ | PEAK1, STK3, PRKG1, ASNS, NEK7, PANK4,                                                                                                                                                                     |

| GO term                                                | ID         | P-value               | FDR P-value1          | Gene                                                                                        |
|--------------------------------------------------------|------------|-----------------------|-----------------------|---------------------------------------------------------------------------------------------|
| Cell migration                                         | GO:0016477 | $1.64 \times 10^{-4}$ | $1.46 \times 10^{-2}$ | WRN, TTF2, HSPA13, TADA1, CDKL2, HNRNPU, RAD51B, CDK12, DDX11, GUCY2F, DOCK1, RAB1A, TMEFF2 |
| Neuronal cell body                                     | GO:0043025 | $1.80 \times 10^{-5}$ | $4.08 \times 10^{-3}$ | DENND1A, RTN4R, GPD5                                                                        |
| Cellular response to hormone stimulus                  | GO:0032870 | $1.07 \times 10^{-3}$ | $4.70 \times 10^{-2}$ | ROBO2, SLIT3                                                                                |
| Plasma membrane                                        | GO:0005886 | $5.04 \times 10^{-5}$ | $9.52 \times 10^{-3}$ | PSTPIP1, VAPA                                                                               |
| G protein-coupled glutamate receptor signaling pathway | GO:0007216 | $1.01 \times 10^{-4}$ | $1.19 \times 10^{-2}$ | DENND1A                                                                                     |
| Dendritic spine                                        | GO:0043197 | $1.43 \times 10^{-4}$ | $1.43 \times 10^{-2}$ | PEAK1                                                                                       |
| Integral component of plasma membrane                  | GO:0005887 | $2.09 \times 10^{-4}$ | $1.74 \times 10^{-2}$ | PEAK1                                                                                       |
| Neuromuscular process controlling balance              | GO:0050885 | $2.15 \times 10^{-4}$ | $1.74 \times 10^{-2}$ | TSPAN3                                                                                      |
| Signal transduction                                    | GO:0007165 | $3.48 \times 10^{-4}$ | $2.29 \times 10^{-2}$ | PSTPIP1                                                                                     |
| Regulation of Rho protein signal transduction          | GO:0035023 | $3.49 \times 10^{-4}$ | $2.29 \times 10^{-2}$ | STK3                                                                                        |
| Cytosol                                                | GO:0005829 | $3.54 \times 10^{-4}$ | $2.29 \times 10^{-2}$ | DENND1A                                                                                     |
| Phosphatidylinositol phosphate binding                 | GO:1901981 | $8.50 \times 10^{-4}$ | $4.13 \times 10^{-2}$ | DENND1A                                                                                     |
| Protein phosphorylation                                | GO:0006468 | $9.44 \times 10^{-4}$ | $4.33 \times 10^{-2}$ | PEAK1, STK3, NEK7, GUCY2F, CDK12, CDKL2, PRKG1                                              |
| Protein serine/threonine phosphatase activity          | GO:0004722 | $6.90 \times 10^{-5}$ | $1.07 \times 10^{-2}$ | LRRC39, PPP2CB, CDC14A                                                                      |
| Calcium ion binding                                    | GO:0005509 | $8.72 \times 10^{-5}$ | $1.18 \times 10^{-2}$ | PCDH9, SCUBE3, LRP8, MASP1, NOTCH2, TBC1D9B, SLIT3, UNC13C, SPOCK1, CAPN9                   |

| GO term                                        | ID         | P-value               | FDR P-value1           | Gene               |
|------------------------------------------------|------------|-----------------------|------------------------|--------------------|
| Focal adhesion                                 | GO:0005925 | $1.28 \times 10^{-4}$ | $1.362 \times 10^{-2}$ | ITGAV, TADA1, NRP1 |
| Neuron projection                              | GO:0043005 | $1.03 \times 10^{-3}$ | $4.55 \times 10^{-2}$  | STK3               |
| Nucleoplasm                                    | GO:0005654 | $1.27 \times 10^{-3}$ | $4.81 \times 10^{-1}$  | SESN1, DENND1A     |
| Protein<br>serine/threonine<br>kinase activity | GO:0004693 | $3.60 \times 10^{-2}$ | $2.53 \times 10^{-1}$  | CDK12, CDKL2       |

FDR, false discovery rate, using Benjamini and Hochberg method.

**Table S10:** Results of KEGG enrichment pathway for identified associated genes

| Gene       | Pathway                                                                                                    |
|------------|------------------------------------------------------------------------------------------------------------|
| VAV3       | Focal adhesion                                                                                             |
| ALDH1A3    | Metabolic pathways, tyrosine metabolism pathway,<br>Phenylalanine metabolism                               |
| ASNS       | Biosynthesis of amino acids pathway,<br>Metabolic pathways, Alanine, aspartate and glutamate<br>metabolism |
| INPP5A     | inositol phosphate metabolism,<br>Phosphatidylinositol signaling system,<br>Metabolic pathways             |
| WNT3A      | melanogenesis pathway                                                                                      |
| AGL        | Metabolic pathways                                                                                         |
| B4GALNT3   | Metabolic pathways                                                                                         |
| UROS       | Metabolic pathways                                                                                         |
| MDH2       | Metabolic pathways, Cysteine and methionine metabolism                                                     |
| PANK4      | Metabolic pathways                                                                                         |
| CSGALNACT1 | Metabolic pathways                                                                                         |
| ACACA      | Metabolic pathways                                                                                         |

| Gene   | Pathway            |
|--------|--------------------|
| GUCY2F | Metabolic pathways |
| DBT    | Metabolic pathways |

**Table S11:** SNPs with a pairwise  $r^2 > 0.4$  with the leader SNP at chr11: 19791413 bp

| CHR_B | BP_B     | SNP_B       | $r^2$    |
|-------|----------|-------------|----------|
| 11    | 19791413 | snp13014847 | 1        |
| 11    | 19796049 | snp13014935 | 0.553646 |
| 11    | 19843385 | snp13015595 | 0.518605 |
| 11    | 19831322 | snp13015478 | 0.517133 |
| 11    | 19790324 | snp13014817 | 0.498257 |
| 11    | 19790325 | snp13014818 | 0.498257 |
| 11    | 19787442 | snp13014732 | 0.494478 |
| 11    | 19801194 | snp13015004 | 0.477453 |
| 11    | 19812348 | snp13015224 | 0.458217 |
| 11    | 19787490 | snp13014733 | 0.457801 |
| 11    | 19822622 | snp13015386 | 0.455626 |
| 11    | 19787109 | snp13014716 | 0.450876 |
| 11    | 19787109 | snp13014716 | 0.450876 |
| 11    | 19841207 | snp13015565 | 0.444914 |
| 11    | 19843073 | snp13015589 | 0.432326 |
| 11    | 19877499 | snp13016373 | 0.430448 |
| 11    | 19797796 | snp13014960 | 0.430025 |
| 11    | 19805443 | snp13015113 | 0.429052 |
| 11    | 19786827 | snp13014710 | 0.428403 |
| 11    | 19797789 | snp13014959 | 0.420744 |
| 11    | 19805435 | snp13015112 | 0.41801  |
| 11    | 19831289 | snp13015477 | 0.415967 |
| 11    | 19805418 | snp13015111 | 0.40756  |
| 11    | 19852185 | snp13015805 | 0.405207 |
| 11    | 19793298 | snp13014870 | 0.403433 |
| 11    | 19860513 | snp13015991 | 0.402408 |

**Supplementary Figure**

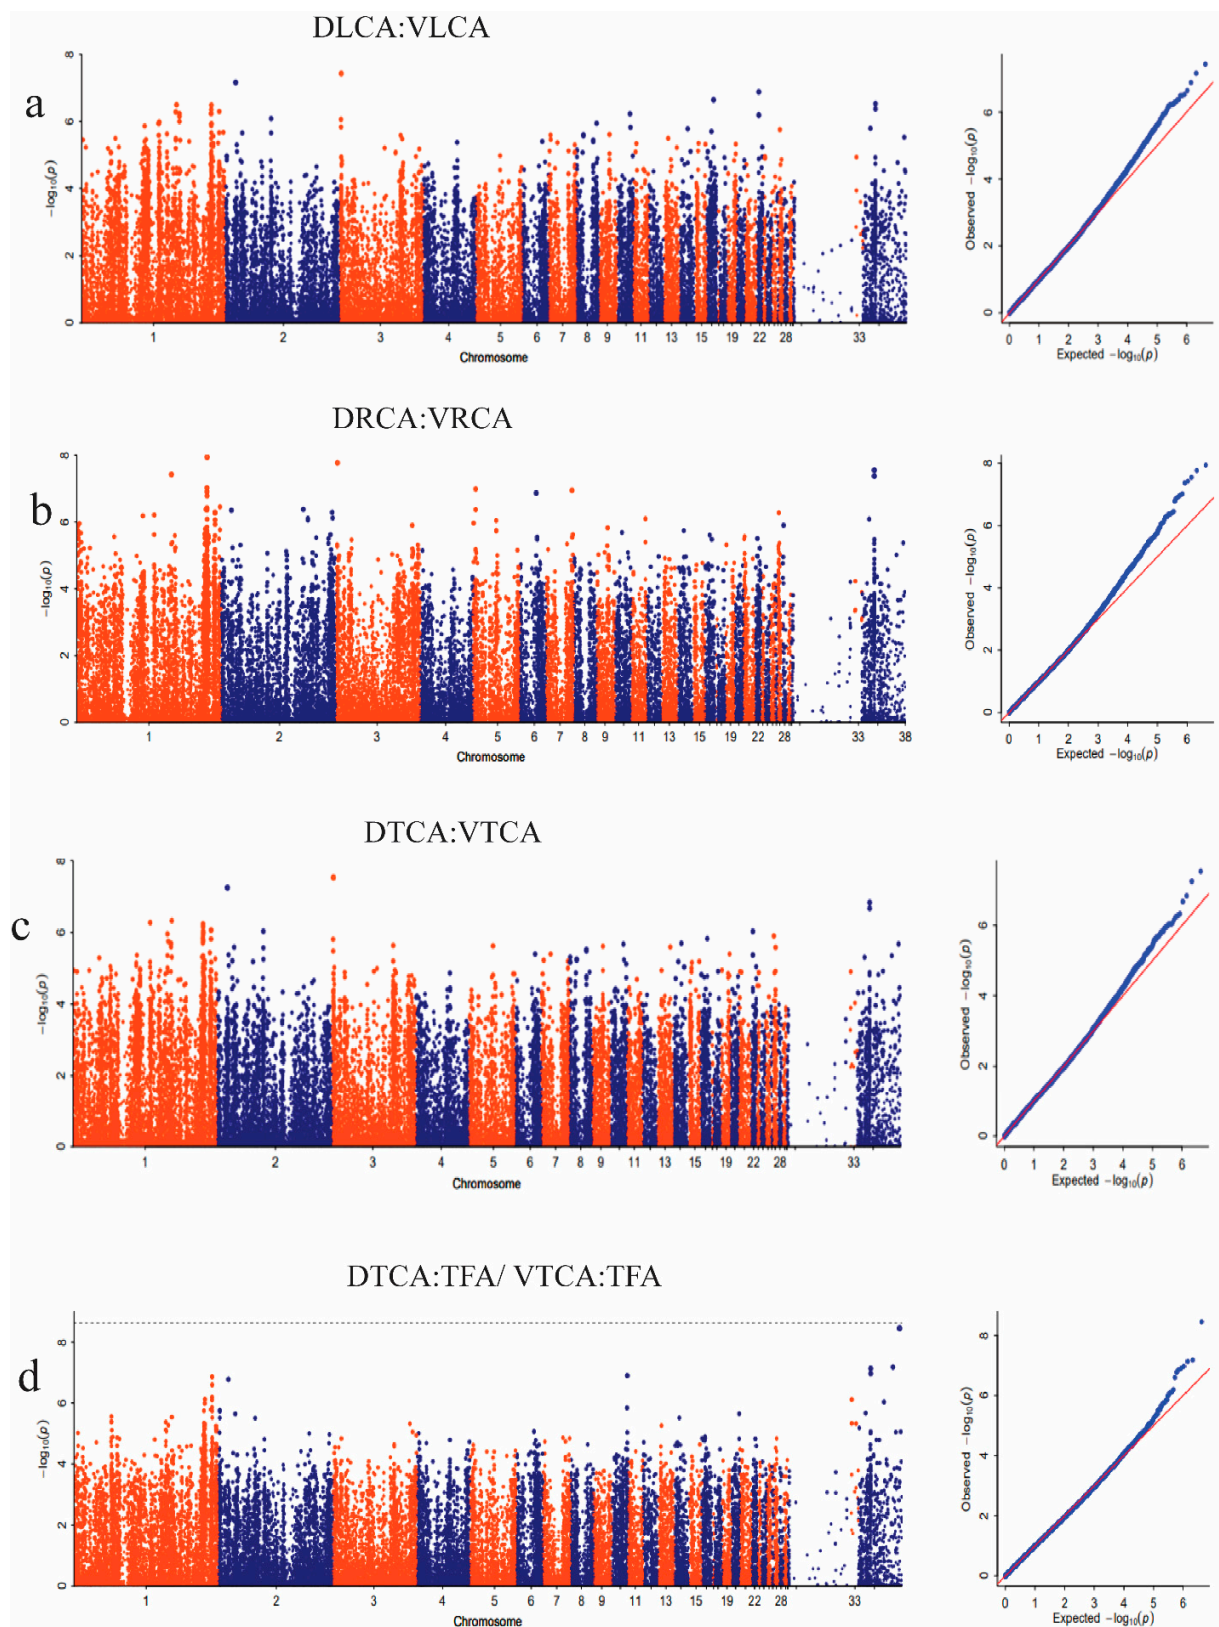



**Figure S1:** Manhattan and QQ plots for countershading parameters. (a) DLCA: VLCA. (b) DRCA: VRCA. (c) DTCA: VTCA. (d) DTCA: TFA/ VTCA: TFA). The  $x$ -axis depicts the physical locations of each SNP along the chromosome, while the  $y$ -axis depicts the  $-\text{Log}_{10}(p)$  values of SNP. The gray dotted lines signify the Bonferroni threshold level (correction threshold = 8.59).
